# Supplementary material for: Reminders of Mortality: Investigating the Effects of Different Mortality Saliences on Somatosensory Neural Activity
Source: MDPI journal article supplement (doi:10.3390/brainsci13071077), 2023-07-16
Supplement: s1 [file s1]

# Reminders of mortality: Investigating the effects of different mortality saliences on somatosensory neural activity

## Supplementary material

### Anxiety model results

|                    |      | Estimate $\pm$ standard deviation | t      | p     | 95% CI        |
|--------------------|------|-----------------------------------|--------|-------|---------------|
| Single group       | CTRL | -0.140 $\pm$ 1.404                | -0.100 | 0.921 | -2.874; 2.571 |
|                    | MS   | 1.620 $\pm$ 1.484                 | 1.092  | 0.280 | -1.283; 4.532 |
| Relationship group | CTRL | 1.033 $\pm$ 1.931                 | 0.535  | 0.594 | -2.696; 4.805 |
|                    | MS   | -3.084 $\pm$ 2.041                | -1.511 | 0.137 | -7.031; 1.053 |

**Table s1.** Results of the mixed effect models on the post-pre state anxiety scores.

### Negative mood results

|                    |      | Estimate $\pm$ standard deviation | t      | p     | 95% CI        |
|--------------------|------|-----------------------------------|--------|-------|---------------|
| Single group       | CTRL | -0.780 $\pm$ 0.621                | -1.257 | 0.212 | -1.975; 0.439 |
|                    | MS   | 0.160 $\pm$ 0.717                 | 0.223  | 0.824 | -1.294; 1.576 |
| Relationship group | CTRL | 0.887 $\pm$ 0.854                 | 1.039  | 0.301 | -0.810; 2.521 |
|                    | MS   | -0.839 $\pm$ 0.987                | -0.850 | 0.399 | -2.774; 1.071 |

**Table s2.** Results of the mixed effect models on the post-pre negative mood scores.

### VROI time-frequency plots and topographies

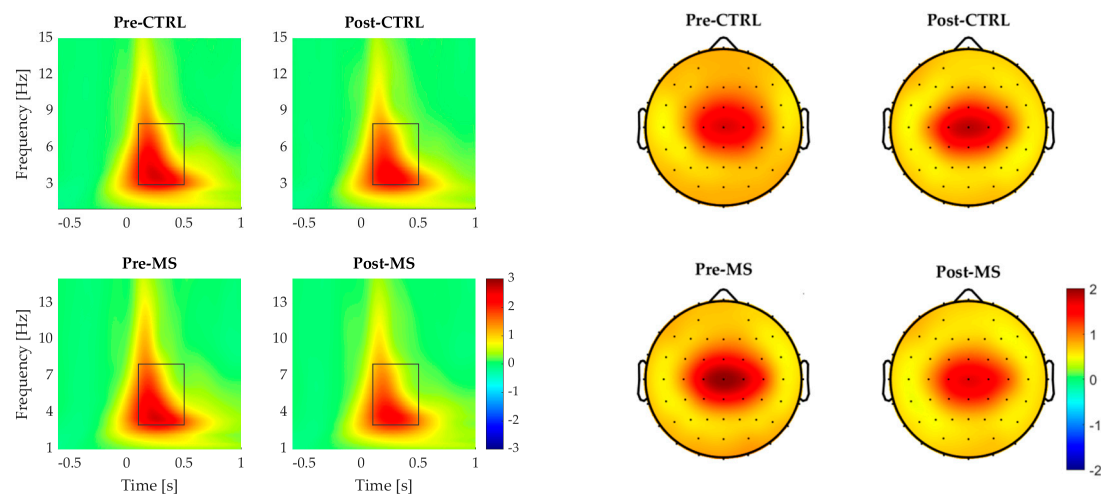

**Figure s1.** Heatmaps and topographies from the Self group low threat condition. The topographies represent the event-related theta activity (3-8 Hz) from 100 – 500 ms post stimulus.

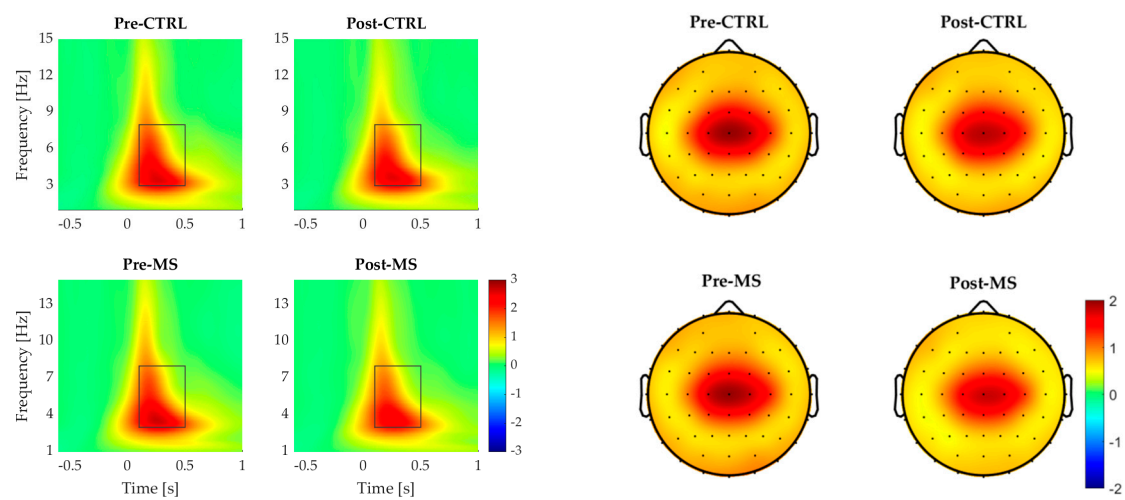

**Figure s2.** Heatmaps and topographies from the Self group high threat condition. The topographies represent the event-related theta activity (3-8 Hz) from 100 – 500 ms post stimulus.

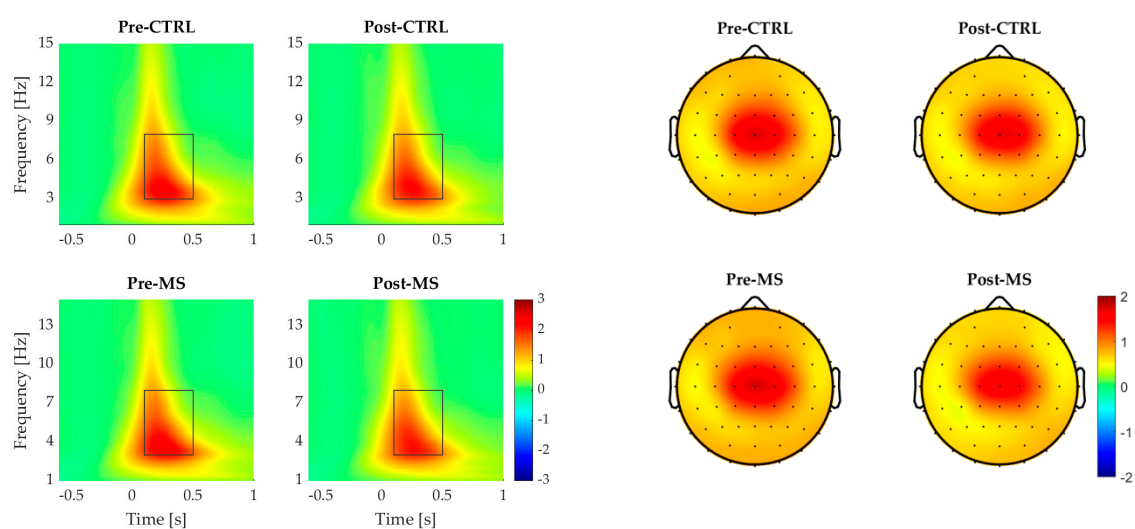

**Figure s3.** Heatmaps and topographies from the Relationship group low threat condition. The topographies represent the event-related theta activity (3-8 Hz) from 100 – 500 ms post stimulus.

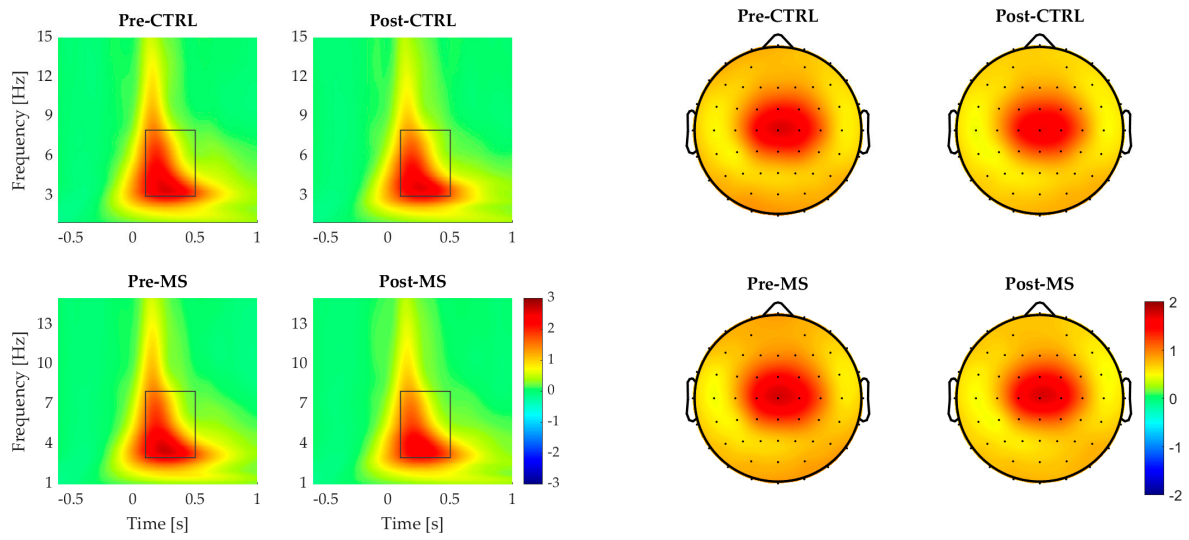

**Figure s4.** Heatmaps and topographies from the Relationship group high threat condition. The topographies represent the event-related theta activity (3-8 Hz) from 100 – 500 ms post stimulus.
